# Supplementary material for: Metabolically healthy obesity: What is the role of sedentary behaviour?
Source: PubMed Central journal article supplement (PMC3995089; doi:10.1016/j.ypmed.2014.01.028), 2014-05
Supplement: mmc1.pdf [file mmc1.pdf]

**Supplementary Table 1:** Mean television viewing time (hours per week) by metabolic health and obesity phenotype in the English Longitudinal Study of Ageing (n=4931)

|                                            | <b>Model 1<sup>a</sup></b> | <b>Model 2<sup>b</sup></b> |
|--------------------------------------------|----------------------------|----------------------------|
|                                            | B (95% CI)                 | B (95% CI)                 |
| Metabolically healthy non-obese (n=1895)   | 31.4 (30.1, 32.6)          | 36.1 (33.4, 38.8)          |
| Metabolically unhealthy non-obese (n=1602) | 38.0 (36.6, 39.3)          | 40.8 (38.2, 43.5)          |
| Metabolically healthy obese (n=299)        | 38.8 (35.7, 41.9)          | 41.9 (38.1, 45.7)          |
| Metabolically unhealthy obese (n=1135)     | 42.0 (40.4, 43.6)          | 43.9 (41.1, 46.7)          |
| <i>p-trend</i>                             | <0.001                     | <0.001                     |

**Supplementary Table 1 legend:** Data are from wave 4 (2008/9) of the English Longitudinal Study of Ageing (England, UK). Mean television viewing time (hours per week) by metabolic health and obesity phenotype. <sup>a</sup>Adjusted for age, sex. <sup>b</sup>Further adjusted for marital status ('married/cohabiting'; 'single/never married/widowed/divorced/separated'), occupational class ('managerial/professional'; 'intermediate'; 'routine/manual'), limiting long-standing illness ('no longstanding illness/has longstanding illness but not limiting'; 'has limiting longstanding illness'), basic and instrumental activities of daily living ('no reported issues'; 'one or more reported issues'), depressive symptoms (CES-D > 3), smoking status ('never smoked'; 'ex-smoker'; 'current smoker'), alcohol consumption ('daily'; 'weekly', 'monthly'; 'rarely/never'), moderate-vigorous physical activity ('hardly ever or never'; 'one to three times per month'; 'once per week or more than once per week').
